# Supplementary material
Source: Springer Nature journal article supplement (https://www.springermedizin.de/resource/supplementary/12955_2011_970_MOESM3_ESM.pdf/9558886)
Supplement: MOESM3 [file 9558886]

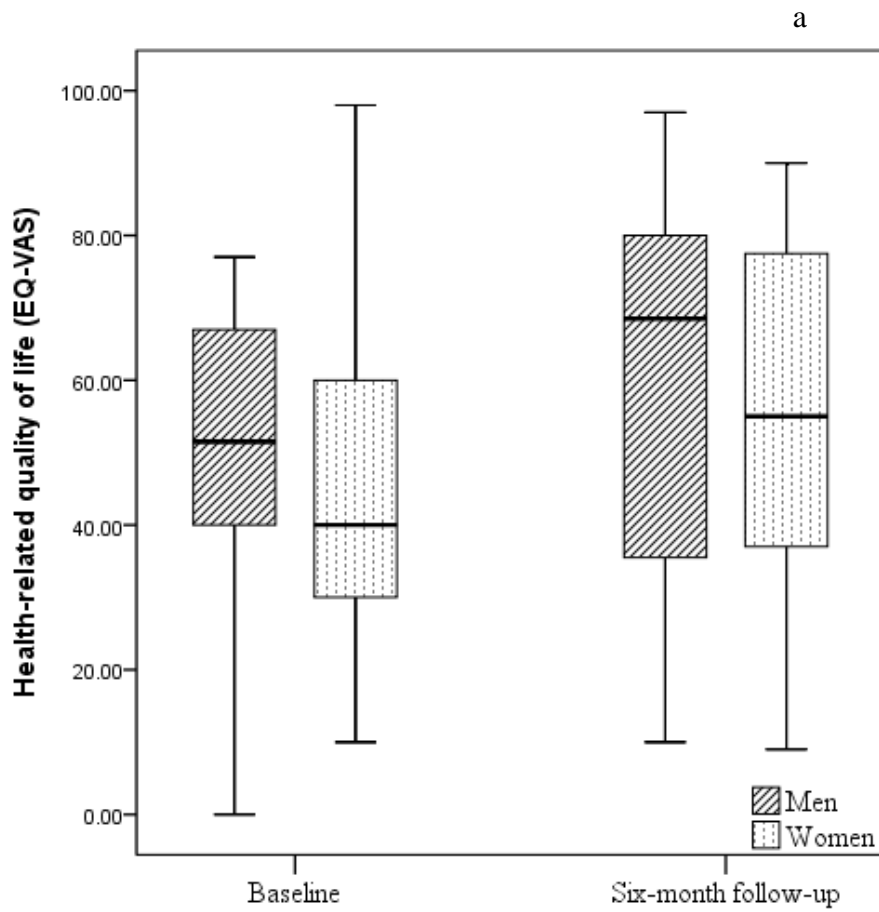

**Figure 1.** Box-plots showing men and women's scores (median, lower- and higher quartiles) on Health-related quality of life at baseline and at six-month follow-up ( $n = 76$ ).

<sup>a</sup> Significant differences ( $P < 0.05$ ) within groups between the two time points (paired-samples  $t$ -test).

No significant differences ( $P < 0.05$ ) between groups at baseline or at six-month follow-up (independent-samples  $t$ -test).
